# Supplementary material for: A template wizard for the cocreation of machine-readable data-reporting to harmonize the evaluation of (nano)materials
Source: Springer Nature journal article supplement (doi:10.1038/s41596-024-00993-1), 2024-05-16
Supplement: MOESM2 [file 41596_2024_993_MOESM2_ESM16.xlsx]

## Sheet: Sheet1
Data entry templates
ID	Template	Project	Provider	Type	Category
AIR_SAMPLING	Air sampling Air sampling	POLYRISK	UU	pchem	Analytical Methods
ALAMARBLUE	Alamar Blue The Alamar Blue (AB) assay is a high throughput, cell metabolism-based method largely applied in toxicology and nanotoxicology to investigate cell viability (cytotoxicity), cell proliferation and cellular metabolic activity in response to chemicals and nanomaterials.	RISKGONE	NILU	doseresponse	Cell Viability
BARRIERCROSSING	Barrier crossing	NANOINFORMATIX		doseresponse	Barrier integrity
BIOACCUMULATION_MUSSELS	Bioaccumulation in mussels	SBD4NANO	INL	ecotox	Bioaccumulation: aquatic / sediment
BIOIMPEDANCE	Bio impedance - human cells Label-free Cell monitoring by Electrical Impedance (bioimpedance). This method can assess cell viability, proliferation, cell-cell and cell-substrate interaction of adherent cells growing onto a microelectrode array.	RISKGONE	University of Bergen (UiB)	doseresponse	Cell Viability
BIOIMPEDANCE_ECOTOX	Bio impedance - ecotoxicity Label-free Cell monitoring by Electrical Impedance (bioimpedance). This method can assess cell viability, proliferation, cell-cell and cell-substrate interaction of adherent cells growing onto a microelectrode array.	RISKGONE	University of Bergen (UiB)	doseresponse	Cell Viability
CARBONYLATION	Determining Protein Carbonylation	GRACIOUS	BfR	doseresponse	Cell Viability
CBMN	Acute 2D/3D cytokinesis-blocked micronucleus (CBMN) assay The micronucleus assay is considered the gold standard for detecting chromosomal damage in vitro. The assay is designed so that cells exposed to a genotoxic test agent result in chromosomal breakage forming small spherical nuclei (micronuclei) being detected as fixed DNA damage.	NANOINFORMATIX	FIOH	doseresponse	Genetic toxicity in vitro
CFE	Colony Forming Efficiency The colony forming efficiency assay (CFE) (also called clonogenic or plating efficiency assay) measures the ability of cells to survive and form colonies, which is an ultimate index of cytotoxicity.	RISKGONE	NILU	doseresponse	Cell Viability
CHARISMA_RR	Raman spectra metadata template Raman spectra metadata including links to spectra files	CHARISMA		pchem	Analytical Methods
COMET	COMET The comet assay, also called SCGE (Single Cell Gel Electrophoresis), is a rapid and informative method to detect DNA damage at single cell level used on many different cell types. The assay detects single and double strand DNA breaks as a consequence of a direct damage or as intermediate of DNA repair processes and it is successfully applied both in in vivo and in vitro genotoxicity testing.	RISKGONE	NILU	doseresponse	Genetic toxicity in vitro
COMPOSITION (CC BY 4.0) https://doi.org/10.5281/zenodo.7751340	Define material composition Detailed information of material component (chemistry, role, identifiers).	HARMLESS	IDEA	pchem	Material composition
COMPOSITION_ICPMS (CC BY-SA 4.0) http://dx.doi.org/10.2760/142959	Elemental composition by ICP-MS	GRACIOUS	JRC	pchem	Analytical Methods
COMPOSITION_XRF (CC BY-SA 4.0) http://dx.doi.org/10.2760/142959	Elemental composition and chemical purity by X-ray Fluorescence (XRF)	GRACIOUS	JRC	pchem	Analytical Methods
CRYSTALLINITY_XRD (CC BY-SA 4.0) http://dx.doi.org/10.2760/142959	Crystallinity by X-Ray diffraction (XRD)	GRACIOUS	JRC	pchem	Crystalline phase
CYTOKINES_RELEASE	Cytokines release Cytokines release	SABYNA	RIVM	doseresponse	Immunotoxicity
DCFH	DCFH (acellular)	GRACIOUS	BfR	doseresponse	Oxidative Stress
DEFAULT	In-vitro assay A generic dose response template.		IOM	doseresponse	Cell Viability
DENSITY_EFFECTIVE (CC BY-SA 4.0) http://dx.doi.org/10.2760/142959	Effective density Multiple materials and results in JRC/NANoREG template style	GRACIOUS	JRC	pchem	Density
DENSITY_EFFECTIVE_RISKGONE (CC BY-SA 4.0) http://dx.doi.org/10.2760/142959	Effective density by VCM (RiskGone) The determination of the effective density of NM by the VCM (Volumetric Centrifugation Method) is based on the measurement of the volume of the pellet obtained by low speed, benchtop centrifugation of NM suspensions in a packed cell volume tube.	RISKGONE		pchem	Density
DENSITY_HEPYCNOMETER (CC BY-SA 4.0) http://dx.doi.org/10.2760/142959	Density - He Pycnometer	GRACIOUS	JRC	pchem	Density
DISSOLUTION (N/A)	Dissolution, dynamic or static	GRACIOUS, GOV4NANO and NanoHarmony		pchem	Water solubility
DISSOLUTIONAQUATIC (CC-BY 4.0) https://doi.org/10.5281/zenodo.7729600	Dynamic dissolution (aquatic) Dynamic dissolution (aquatic)	HARMLESS	BASF	pchem	Water solubility
DISSOLUTIONIONS (CC-BY 4.0) https://doi.org/10.5281/zenodo.7729600	Dynamic dissolution in lung stimulant fluid Dynamic dissolution of a test material in lung simulant fluids is monitored via a continuous flow system consisting of a heat cabinet with reservoir, flow-through cells, peristaltic pump set at 2mL/h and external autosampler. Leaching/biopersistence of relevant metals may be estimated after analysis of the samples in time by a suitable analytical method…	HARMLESS	BASF	pchem	Water solubility
DOSERESPONSE_TABLE	In-vitro assay (results as a table) A generic dose response template.		IOM	doseresponse	Cell Viability
ECOTOX (CC BY-SA 4.0) http://dx.doi.org/10.2787/505397	Ecotoxicity - fish, daphnia, algae, soil	NANOREG	JRC	ecotox	Short-term toxicity to aquatic inverterbrates
ECOTOXTDRF	Ecotoxicity - dose response Dose response template for ecotoxicity experiment		IOM	doseresponse	Short-term toxicity to aquatic inverterbrates
ECR (CC BY 4.0) https://zenodo.org/record/4665253	ECR- Environmental Consumer Release The ECHA Use descriptors will be included in the downloaded template and available for selection in the relevant field. If you don't select any items, all values will be included in the template, otherwise, only the selected items will be included.	GRACIOUS	LEITAT	exposure_release	Use and exposure information
ENZYME	ACETYLCHOLINESTERASE - INHIBITION, ADSORPTION This type of NM characterisation is called biological characterisation based on enzyme inhibition/adsorption intensity. The more biologically reactive the suspended material (has a potential to inhibit enzyme) or the surface (has a potential to adsorb to the surface) the higher the inhibition of enzyme activity is. Results show that AChE is a promisin…	PLASTICFATE	University of Ljubljana	doseresponse	Oxidative Stress
FRAS (CC-BY 4.0) https://doi.org/10.5281/zenodo.7729589	Ferric Reduction Ability of Serum Ferric reducing ability of serum (FRAS) assay template. FRAS assay is an indirect assay, based on the principle of absorbance change due to reduction of an Fe3+ complex to Fe2+ complex, by the residual antioxidants in a sample, pre-incubated with a nanomaterial.The absorbance change is correlated to the antioxidant capacity of the serum: the more antioxidants spe…	HARMLESS	BASF	doseresponse	Oxidative Stress
HEMOLYSIS (CC-BY 4.0) ?	HEMOLYSIS ?	HARMLESS	BASF	doseresponse	Oxidative Stress
HPRT	HPRT gene mutation assay - SWANSEA layout The hypoxanthine-guanine phosphoribosyl transferase (HPRT) gene is located on the X chromosome of mammalian cells and is used as a model gene to investigate gene mutation. The in vitro mammalian cell gene mutation assay is significantly important for detecting point mutations induced by engineered nanomaterials (ENMs) as the bacterial reverse gene mutatio…	RISKGONE	SWANSEA	doseresponse	Genetic toxicity in vitro
HPRTNILU	HPRT gene mutation assay - NILU layout The hypoxanthine-guanine phosphoribosyl transferase (HPRT) gene is located on the X chromosome of mammalian cells and is used as a model gene to investigate gene mutation. The in vitro mammalian cell gene mutation assay is significantly important for detecting point mutations induced by engineered nanomaterials (ENMs) as the bacterial reverse gene mutation a…	RISKGONE	NILU	doseresponse	Genetic toxicity in vitro
HTS_METADATA	Metadata including links to data files High Throughput Screening (HTS) metadata, with links to data files	HARMLESS		metadata	Cell Viability
HYDROPHOBICITY_CONTACTANGLE (CC BY-SA 4.0) http://dx.doi.org/10.2760/142959	Hydrophobicity by Contact Angle	GRACIOUS	JRC	pchem	Water solubility
IL8_ELISA	[PATROLS template] ELISA Detection of IL-8 ELISA Detection of IL-8	PATROLS		doseresponse	Immunotoxicity
MICRONUCLEUS	Long-Term 3D cytokinesis-blocked micronucleus (CBMN) assay The template for 3D cell models follows the structure of a 2D template. Still, it differs in the “Raw data” spreadsheet, where the metadata expected to be filled up follows the specificity of experiments to detect micronucleus in 3D spheroids (PATROLS, D4.1 SOPs for GIT and liver 3D advanced models optimised for long-term exposures.	PATROLS	SWANSEA	doseresponse	Genetic toxicity in vitro
MODELS	Models metadata Models metadata	SBD4NANO	Maastricht University	metadata	Computational models metadata
NEUTROPHIL_SURVIVAL	Neutrophil survival Neutrophil survival		POLYRISK/UU	doseresponse	Cell Viability
NOPRODUCTION	Nitric Oxide production	SBD4NANO		doseresponse	Oxidative Stress
NRF2ACTIVATION	NRF2 Activation assay This template allows data entry for multiple materials. Please specify the number of materials in the relevant web form field.	GRACIOUS	BfR	doseresponse	Cell Viability
NRU	Neutral Red Uptake Assay	GRACIOUS	BfR	doseresponse	Cell Viability
OECD202	Ecotoxicity: Daphnia magna acute immobilisation test Short-term toxicity to aquatic inverterbrates OECD 202		UoB	doseresponse	Short-term toxicity to aquatic inverterbrates
OECD211	Ecotoxicity: Daphnia magna reproduction test Long-term toxicity to aquatic inverterbrates OECD 211		UoB	doseresponse	Long-term toxicity to aquatic inverterbrates
OECD236_FET	OECD 236 Fish Embryo Acute Toxicity (FET) Test	SBD4NANO	INL	ecotox	Short-term toxicity to fish
OMICS (CC BY-NC-SA 4.0)	Omics metadata А metadata map for omics data with columns relevant for nanosafety. Omics data stored in e.g. Gene Expression Omnibus (GEO), ArrayExpress, or PRIDE implement omics community standards, including minimum information requirements for omics experiments. However, the databases lack field-specific metadata, such as that defined within the nanosafety community, which leads to poor intero…	NANOREG2	KI	metadata	Omics metadata
OMICSINVIVO (CC BY-NC-SA 4.0)	Omics in-vivo metadata OMICS template extended with fields for in-vivo studies	HARMLESS	KI,NRCWE	metadata	Omics metadata
ORE (CC BY 4.0) https://zenodo.org/record/4665253	ORE- Occupational Release The ECHA Use descriptors will be included in the downloaded template and available for selection in the relevant field. If you don't select any items, all values will be included in the template, otherwise, only the selected items will be included.	GRACIOUS	LEITAT	exposure_release	Use and exposure information
PATROLSAB	[PATROLS template] Alamar Blue Alamar Blue template by PATROLS	PATROLS		doseresponse	Cell Viability
PC_DUSTINESS (CC BY-SA 4.0) http://dx.doi.org/10.2787/505397	Dustiness with small drum	NANOREG	JRC	pchem	Dustiness
PC_GRANULOMETRY_DLS (CC BY-SA 4.0) http://dx.doi.org/10.2787/505397	Hydrodynamic particle size by DLS	NANOREG	JRC	pchem	Particle size distribution (Granulometry)
PC_GRANULOMETRY_GRACIOUS (CC BY-SA 4.0) http://dx.doi.org/10.2760/142959	Particle size distribution by ES-DMA, CLS (AUC)	GRACIOUS	JRC	pchem	Particle size distribution (Granulometry)
PC_GRANULOMETRY_NANOREG (CC BY-SA 4.0) http://dx.doi.org/10.2787/505397	Particle size distribution by TEM, DLS	NANOREG	JRC	pchem	Particle size distribution (Granulometry)
PC_GRANULOMETRY_NANOREG_RISKGONE (CC BY-SA 4.0) http://dx.doi.org/10.2787/505397	Particle size distribution by TEM, DLS,NTA (RiskGone) Multiple materials and results in JRC/NANoREG template style - modified by RiskGone	RISKGONE		pchem	Particle size distribution (Granulometry)
PC_GRANULOMETRY_NTA (CC BY-SA 4.0) http://dx.doi.org/10.2787/505397	Particle size and particle counting by Nanoparticle Tracking Analysis NTA technique provides size characterization based on the free diffusion behavior of particles in solution. NTA measures particle diffusion by tracking the random motion of single particles in solution via high temporal-resolution video acquisition and enhanced contrast microscopy. The diffusion of the objects in suspension is …	NANOREG	JRC	pchem	Particle size distribution (Granulometry)
PC_GRANULOMETRY_SAXS (CC BY-SA 4.0) http://dx.doi.org/10.2787/505397	SAXS	NANOREG	JRC	pchem	Particle size distribution (Granulometry)
PC_GRANULOMETRY_TEM (CC BY-SA 4.0) http://dx.doi.org/10.2787/505397	Particle size distribution by TEM	NANOREG	JRC	pchem	Particle size distribution (Granulometry)
PC_MICROSCOPY_COUNTING	Particle counting by microscopy Microscopy measurements to estimate the number, size distribution and classification of particles	POLYRISK	Fraunhofer CSP	pchem	Analytical Methods
PC_PY_GC_MS	Pyrolysis GC-MS for Qualitative Analysis of Polymer Materials Py-GC-MS	POLYRISK	VU	pchem	Analytical Methods
PC_SPECTRA_RAMAN (CC BY-SA 4.0)	NANOREG Raman data template (updated by PLASTICFATE)	PLASTICFATE	CSIC	pchem	Analytical Methods
PC_SURFACECHEMISTRY_FTIR (CC BY-SA 4.0) http://dx.doi.org/10.2760/142959	Surface Chemistry (FTIR)	GRACIOUS	JRC	pchem	Analytical Methods
PC_SURFACECHEMISTRY_TGA (CC BY-SA 4.0) http://dx.doi.org/10.2760/142959	Surface Chemistry (TGA)	GRACIOUS	JRC	pchem	Analytical Methods
PC_TGA_DEGRADATION	Degradation behavior by TGA	PLASTICFATE	BAM	pchem	Analytical Methods
PC_VIBRATIONALSPECTROSCOPY_COUNTING	Particle counting by vibrational spectroscopy Vibrational spectroscopy measurements Such as µFT-IR or µRaman are used to estimate the number, size distribution classification and the type of micro and nanoparticles (in special plastics). The analysis of spectra and mapping images can be done using different techniques.	POLYRISK	Fraunhofer CSP	pchem	Analytical Methods
REDOXPOTENTIAL	Redox Potential	NANOINFORMATIX		pchem	Oxidative Stress
SSA_BET (CC BY-SA 4.0) http://dx.doi.org/10.2760/142959	Specific Surface Area by BET (Brunauer, Emmett and Teller) method	GRACIOUS	JRC	pchem	Specific surface area
SSA_SEARSTITRATION (CC BY-SA 4.0) http://dx.doi.org/10.2760/142959	Specific Surface Area by Sears Titration (for colloidal silica)	GRACIOUS	JRC	pchem	Specific surface area
STIS	Short term intratracheal instillation STIS	HARMLESS	NRCWE	invivo	Acute and sub-chronic toxicity - pulmonary instillation
SURFACECHEMISTRY_XPS (CC BY-SA 4.0) http://dx.doi.org/10.2760/142959	Surface Chemistry by X-ray Photoelectron Spectroscopy (XPS)	GRACIOUS	JRC	pchem	Surface chemistry
TEER	[PATROLS template] TEER - Transepitelial Electrical Resistance TEER - Transepitelial Electrical Resistance	PATROLS		doseresponse	Cell Viability
TNFA_ELISA	[PATROLS template] ELISA Detection of TNF-α ELISA Detection of TNF-α	PATROLS		doseresponse	Immunotoxicity
WST1	WST-1 Assay for Cell Proliferation and Viability	GRACIOUS	BfR	doseresponse	Cell Viability
ZETAPOTENTIAL (CC BY-SA 4.0) http://dx.doi.org/10.2760/142959	Zeta Potential	GRACIOUS	JRC	pchem	Zeta potential
ZETAPOTENTIAL_RISKGONE (CC BY-SA 4.0) http://dx.doi.org/10.2760/142959	Zeta Potential by ELS (RiskGone) The zeta potential is the property defining the surface charge of a material dispersed in a liquid. ELS technique is used to estimate the zeta potential of nanoparticles in suspension from their electrophoretic mobility. The zeta potential and the electrophoretic mobility are then related by the Henry equation.	RISKGONE		pchem	Zeta potential
